# Supplementary material for: Hierarchical theranostic nanomedicine: MRI contrast agents as a physical vehicle anchor for high drug loading and triggered on-demand delivery
Source: Royal Society of Chemistry journal article supplement (doi:10.1039/c8tb00135a), 2018-01-01
Supplement: c8tb00135a1.pdf [file c8tb00135a1.pdf]

# **Hierarchically Theranostic Nanomedicine: MRI Contrast Agents as the Physical Vehicle Anchor for High Drug Loading and Triggered on-demand Delivery**

Guangqin Liu,<sup>a#</sup> Jian Deng,<sup>a#</sup> Fang Liu,<sup>a</sup> Zheng Wang,<sup>a,b</sup> Dan Peer,<sup>c</sup> and Yanjun Zhao<sup>a,\*</sup>

<sup>a</sup> School of Pharmaceutical Science & Technology, Tianjin Key Laboratory for Modern Drug Delivery & High Efficiency, and Collaborative Innovation Center of Chemical Science and Engineering (Tianjin), Tianjin University, 92 Weijin Road, Nankai District, Tianjin, 300072, China

<sup>b</sup> State of Key Laboratory of Medicinal Chemical Biology, Nankai University, Tianjin 300071, China.

<sup>c</sup> Laboratory of Precision NanoMedicine, Department of Cell Research & Immunology, George S. Wise Faculty of Life Sciences; Department of Materials Sciences and Engineering, Iby and Aladar Fleischman Faculty of Engineering; Center for Nanoscience and Nanotechnology, and Cancer Biology Research Center, Tel Aviv University, Tel Aviv 69978, Israel.

Email: zhaoyj@tju.edu.cn (Y Zhao)

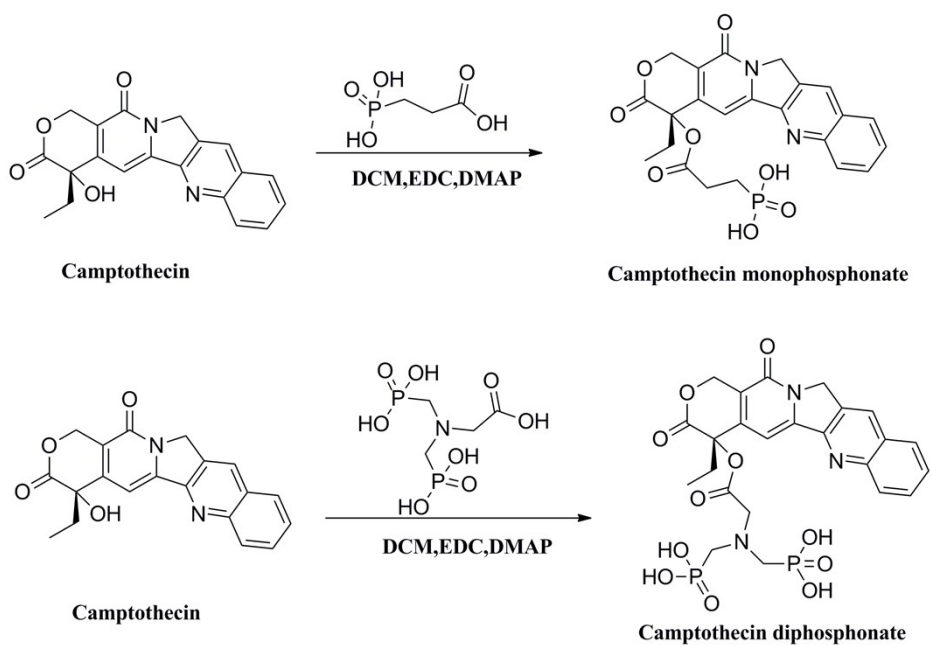

**Scheme S1.** Synthetic route of camptothecin monophosphate (CPT-P) and camptothecin diphosphate (CPT-2P).

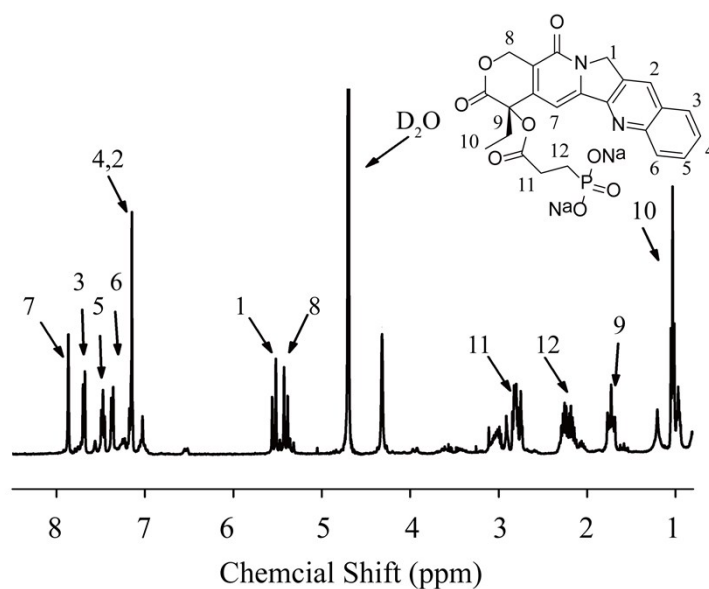

**Figure S1.**  $^1\text{H}$  NMR spectrum of camptothecin phosphate (CPT-P) ( $\text{D}_2\text{O}$ ).

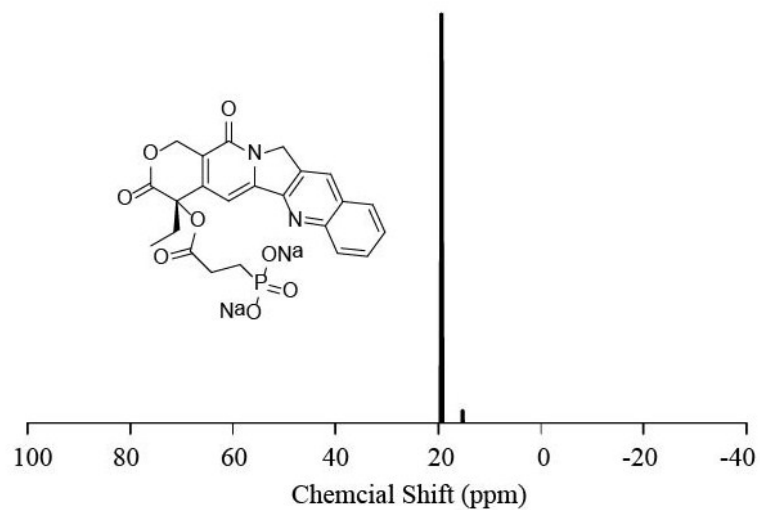

**Figure S2.**  $^{31}\text{P}$  NMR spectrum of camptothecin phosphate (CPT-P) ( $\text{D}_2\text{O}$ ).

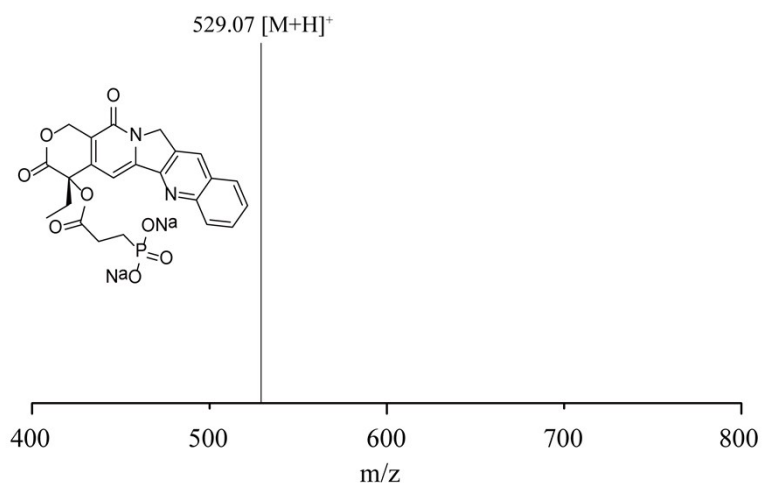

**Figure S3.** The mass spectrum of camptothecin phosphate (CPT-P).

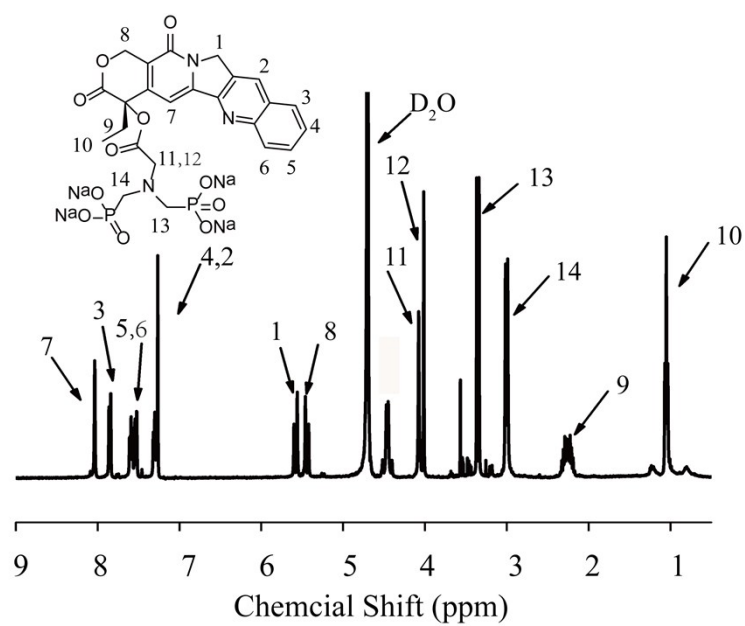

**Figure S4.**  $^1\text{H}$  NMR spectrum of camptothecin diphosphate (CPT-2P) ( $\text{D}_2\text{O}$ ).

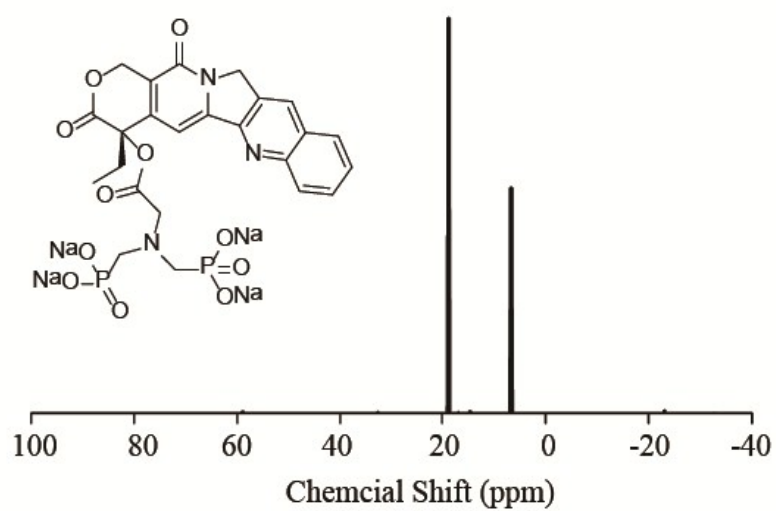

**Figure S5.**  $^{31}\text{P}$  NMR spectrum of camptothecin diphosphate (CPT-2P) ( $\text{D}_2\text{O}$ ).

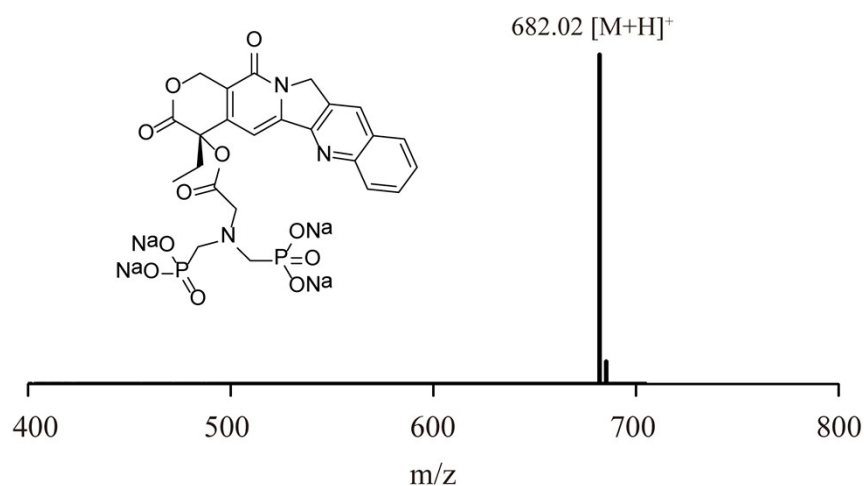

**Figure S6.** The mass spectrum of camptothecin diphosphate (CPT-2P).

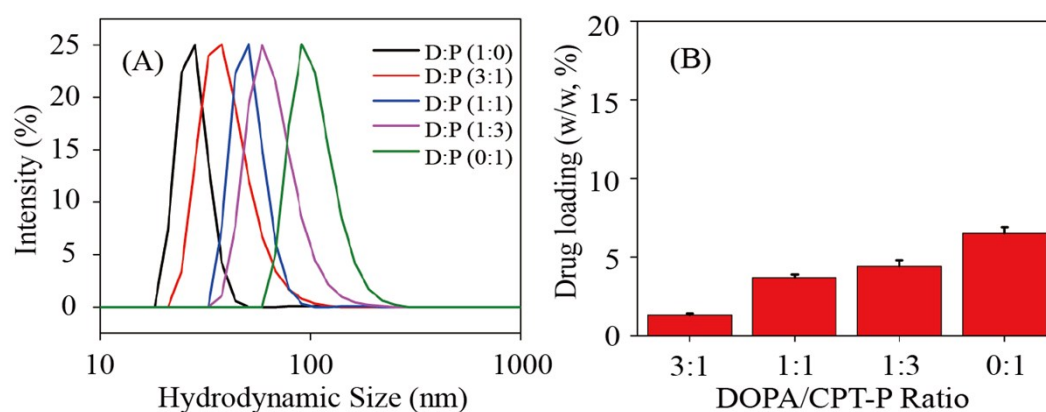

**Figure S7.** The influence of dioleoylphosphatidic acid (DOPA or D) and camptothecin monophosphonate (CPT-P or P) ratio on the particle size and drug loading in hybrid nanocarriers. (A) The hydrodynamic sizes of the hybrid nanocarrier when the mixture of a DOPA lipid and a model drug (CPT-P) at different molar ratios (D:P) were supplemented for the particle fabrication; (B) The drug loadings of four types of hybrid nanocarrier in corresponding to different D:P ratio.

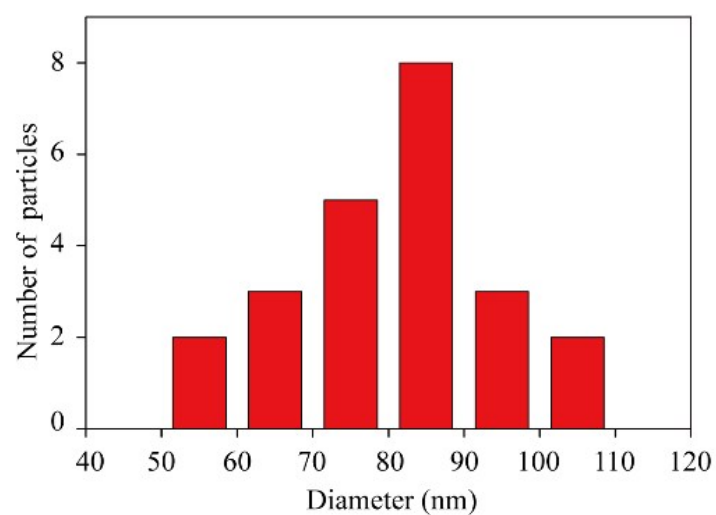

**Figure S8.** The number-based size and size distribution of micelles based on the TEM analysis in Figure 1D.

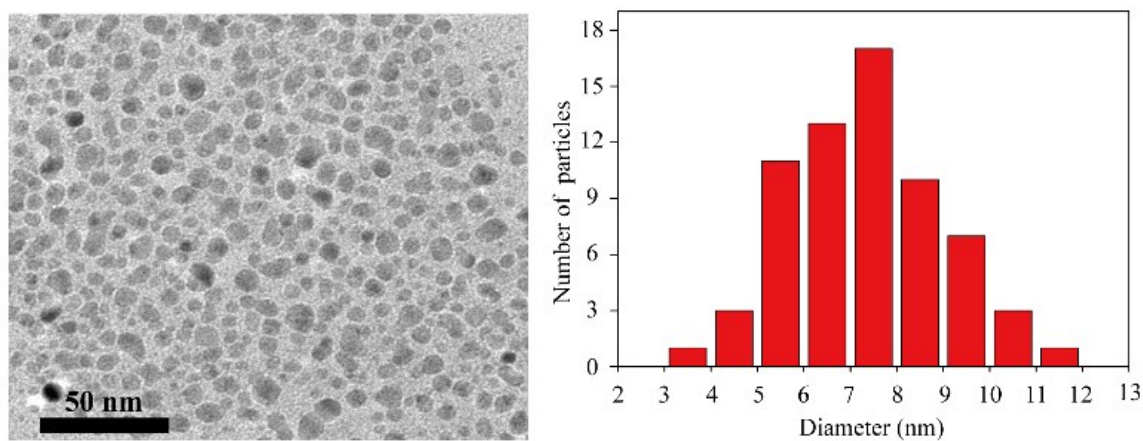

**Figure S9.** The TEM size of LMnP core and corresponding number-based size and size distribution histogram.

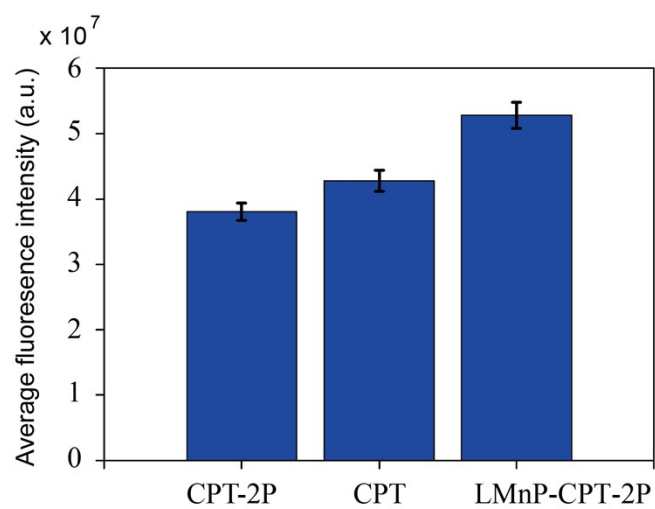

**Figure S10.** The average drug fluorescence intensity when three samples (CPT-2P, CPT and LMnP-CPT-2P) were incubated with 4T1 cells for 4 hours. The data were extracted from Figure 3B.

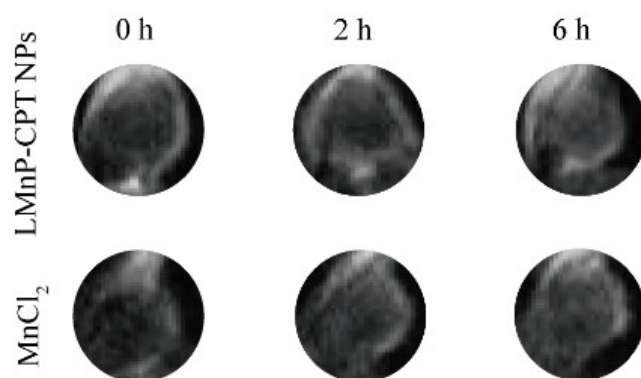

**Figure S11.** The enlarged MR images of tumor in Figure 4A.

**Table S1.** Significant comparison of three different formulations in terms of IC<sub>50</sub>. Free CPT ( $3.9 \pm 0.3 \mu\text{M}$ ), free CPT-2P ( $6.4 \pm 1.0 \mu\text{M}$ ), LMnP-CPT-2P nanocarrier ( $5.4 \pm 0.3 \mu\text{M}$ ).

| Samples                                 | Significant Difference |
|-----------------------------------------|------------------------|
| Free CPT vs. Free CPT-2P                | Yes ( $p < 0.05$ )     |
| Free CPT vs. LMnP-CPT-2P Nanocarrier    | Yes ( $p < 0.05$ )     |
| Free CPT-2P vs. LMnP-CPT-2P Nanocarrier | No ( $p > 0.05$ )      |
